# Supplementary material
Source: PubMed Central journal article supplement (PMC2556627)
Supplement: blood-2008-04-148767_1.pdf [file blood-2008-04-148767_1.pdf]

| Patient   | Age (years) | Initial Cardiac R2* (Hz) | Initial HIC (mg/g) | MRI Time (years) | Time-course AUC | Ending Chelator | Chelator Duration (years) |
|-----------|-------------|--------------------------|--------------------|------------------|-----------------|-----------------|---------------------------|
| 1         | 43.8        | 111.1                    | 3.9                | 3.7              | 50.5            | DSX             | 0.4                       |
| 2         | 35.5        | 120.5                    | 1.8                | 0.9              | -11.8           | DFO/L1          | 5.1                       |
| 3         | <i>35.3</i> | <i>30.3</i>              | 2.9                | 2.8              | <i>74.6</i>     | <i>DFO</i>      | *                         |
| 4         | 33.1        | 75.8                     | 5.6                | 1.2              | -10.9           | DFO             | *                         |
| 5         | 32.3        | 47.9                     | 36.2               | 2.8              | -37.2           | DSX             | 1.0                       |
| <b>6</b>  | <b>30.7</b> | <b>500.0</b>             | <b>18.8</b>        | <b>4.8</b>       | <b>113.5</b>    | <b>DFO</b>      | *                         |
| <b>7</b>  | <b>30.0</b> | <b>135.1</b>             | <b>2.8</b>         | <b>4.9</b>       | <b>90.2</b>     | <b>DFO</b>      | *                         |
| 8         | 27.9        | 20.9                     | 19.8               | 4.0              | -15.3           | DFO             | *                         |
| 9         | 26.1        | 22.7                     | 12.9               | 4.3              | 15.7            | DSX             | 1.0                       |
| 10        | 25.4        | 281.7                    | 37.6               | 4.2              | 449             | DSX             | 1.5                       |
| 11        | 25.1        | 30.3                     | 6.5                | 4.3              | 14.3            | DSX             | 1.4                       |
| <i>12</i> | <i>24.7</i> | <i>30.6</i>              | <i>41.7</i>        | <i>4.4</i>       | <i>93.6</i>     | <i>DFO</i>      | *                         |
| 13        | 24.6        | 24.9                     | 25.3               | 4.5              | -35.9           | DSX             | 0.7                       |
| 14        | 22.8        | 24                       | 3.2                | 3.8              | -26.5           | DFO             | *                         |
| 15        | 22.2        | 133.3                    | 8.8                | 2.9              | 40.7            | DSX             | 3.8                       |
| 16        | 21.9        | 62.5                     | 4.8                | 3.7              | 91.4            | DFO             | *                         |
| 17        | 20.9        | 166.7                    | 15.5               | 1.9              | 65.7            | DSX             | 1.4                       |
| 18        | 20.9        | 151.1                    | 12.3               | 1.9              | 45.3            | DSX             | 1.4                       |
| 19        | 20.3        | 100.6                    | 15.5               | 1.0              | 69.3            | DSX             | 1.5                       |
| 20        | <i>20.2</i> | <i>48.1</i>              | <i>26</i>          | <i>4.7</i>       | <i>124.3</i>    | <i>DSX</i>      | <i>2.0</i>                |
| <b>21</b> | <b>20.0</b> | <b>38.6</b>              | <b>17</b>          | <b>2.5</b>       | <b>43</b>       | <b>DSX</b>      | <b>1.0</b>                |
| 22        | 19.2        | 25.2                     | 6.7                | 3.8              | -9.7            | DSX             | 2.6                       |
| 23        | 18.4        | 23.2                     | 5.1                | 4.7              | 27.1            | DSX             | 4.3                       |
| 24        | 18.0        | 238.1                    | 12.2               | 1.0              | 200.6           | DSX             | 1.1                       |
| 25        | 16.4        | 25                       | 3.5                | 2.7              | 13.8            | DSX             | 0.7                       |
| 26        | 15.5        | 23.9                     | 5.3                | 2.4              | 7.4             | DSX             | 3.7                       |
| 27        | 15.3        | 138.3                    | 41.9               | 3.4              | 327.8           | L1              | 2.2                       |
| 28        | 14.4        | 40.5                     | 5.1                | 1.9              | -13.8           | DSX             | 0.7                       |
| <b>29</b> | <b>12.9</b> | <b>114.9</b>             | <b>10.2</b>        | <b>2.6</b>       | <b>64.4</b>     | <b>DSX</b>      | <b>1.4</b>                |
| 30        | 11.9        | 19.3                     | 3.4                | 2.2              | -6.8            | DSX             | 1.1                       |
| 31        | 11.8        | 32.1                     | 19.5               | 4.7              | -20.1           | DSX             | 1.2                       |
| 32        | 11.4        | 21.6                     | 3.9                | 3.9              | -22             | DSX             | 0.5                       |
| 33        | <i>11.3</i> | <i>35.5</i>              | <i>7.2</i>         | <i>3.8</i>       | <i>23</i>       | <i>DSX</i>      | <i>0.9</i>                |
| 34        | 10.9        | 28                       | 15.6               | 2.7              | -37.1           | DSX             | 1.0                       |
| 35        | 8.6         | 25.5                     | 15.8               | 1.2              | 22              | DSX             | 0.4                       |
| 36        | 8.2         | 24                       | 31.8               | 2.1              | 55              | DSX             | 1.0                       |
| 37        | 8.2         | 40.7                     | 34.3               | 2.1              | 37.7            | DSX             | 1.0                       |
| 38        | 5.4         | 33.1                     | 17.5               | 2.4              | 24.6            | DSX             | 1.1                       |

Italicized patients transitioned above R2\*=50 Hz

Bolded patients transitioned below R2\*=50 Hz

\*Average time on DFO for these patients is 1.1 ± 0.9 years<sup>1</sup>

DFO indicates Deferoxamine; DSX, Deferasirox; L1, Deferiprone.

<sup>1</sup>Wood JC, Origa R, Agus A, Matta G, Coates TD, Galanello R. Onset of cardiac iron loading in pediatric patients with thalassemia major. Haematologica. Vol. In Press; 2008
